# Supplementary material
Source: PubMed Central journal article supplement (PMC3666668)
Supplement: 1221775110_pnas.201221775SI.pdf [file 1221775110_pnas.201221775SI.pdf]

# Supporting Information

Muñoz-Marín et al. 10.1073/pnas.1221775110

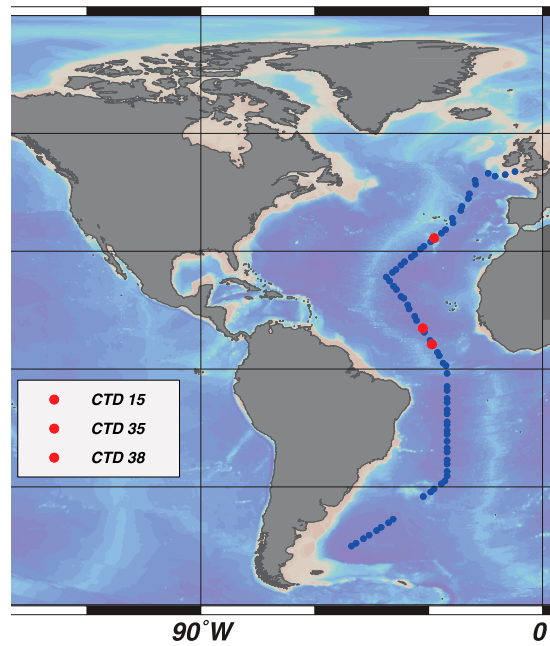

**Fig. S1.** Outline of the Atlantic Meridional Transect 21 cruise. Blue dots represent sampling points along the cruise. Red dots indicate sampling points where glucose uptake by *Prochlorococcus* was observed; the depth of the corresponding samples is shown in Table 1. Further information is available at the AMT-21 Cruise report ([www.amt-uk.org/pdf/AMT21\\_Cruise\\_Report.pdf](http://www.amt-uk.org/pdf/AMT21_Cruise_Report.pdf)).

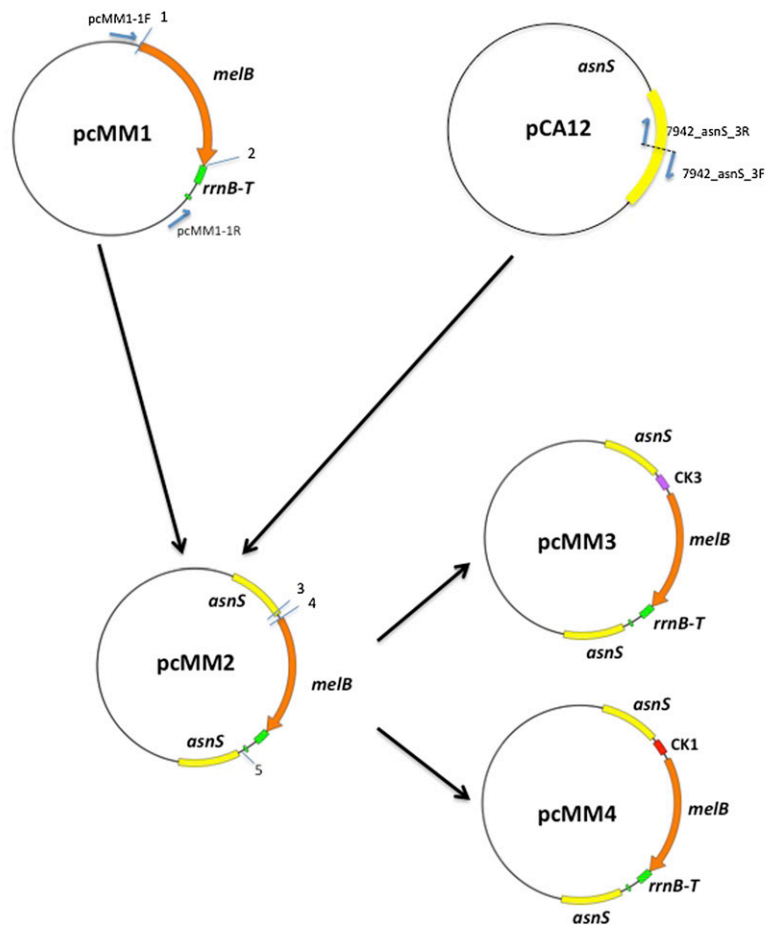

*melB*: putative melibiose/sodium symporter  
*rrnB-T*: *rrnB* transcriptional terminator  
*asnS*: asparaginyI-tRNA synthetase  
 C.K1: Kanamycin-resistance cassette with a moderate promoter and no transcriptional terminator  
 C.K3: Kanamycin-resistance cassette with a strong promoter and no transcriptional terminator

1: NcoI  
 2: HindIII  
 3: HpaI  
 4: NdeI  
 5: XhoI

pcMM1-1F:  
 5'-(Phos)GTTAACAACAGCATATGCTTCTATGGATTAGGAG  
 pcMM1-1R:  
 5'-(Phos)CATTTCGAGGTTATTGTCTCATGAGCGG  
 7942\_ *asnS*\_3F:  
 5'-TTCGCGCTGAGAACTCCAATACC  
 7942\_ *asnS*\_3R:  
 5'-AAGTCGGGCCAAAGGTGTAGAGC

Fig. S2. Outline of the strategy used to construct the recombinant *Synechococcus elongatus* strains used in this work.
